# Supplementary material for: Towards effective outbreak detection: a qualitative study to identify factors affecting nurses’ early warning surveillance practice in Solomon Islands
Source: PubMed Central journal article supplement (PMC6131946; doi:10.1186/s12913-018-3508-9), 2018-09-10
Supplement: 12913_2018_3508_MOESM1_ESM.pdf [file 12913_2018_3508_MOESM1_ESM.pdf]

**KNOWLEDGE-ATTITUDE-PRACTICE STUDY INTERVIEW DATA COLLECTION FORM**

|                                                       |                                                                                                            |                                                                                                                                                              |
|-------------------------------------------------------|------------------------------------------------------------------------------------------------------------|--------------------------------------------------------------------------------------------------------------------------------------------------------------|
| <b>ADMINISTRATION</b>                                 |                                                                                                            |                                                                                                                                                              |
| 1                                                     | Date                                                                                                       | [Date format]                                                                                                                                                |
| 2                                                     | Location                                                                                                   | [Options list]                                                                                                                                               |
| 3                                                     | Interviewer                                                                                                | [Options list]                                                                                                                                               |
| 4                                                     | Consent form number                                                                                        | [Number]                                                                                                                                                     |
| 5                                                     | Permission to record                                                                                       | <input type="radio"/> Yes<br><input type="radio"/> No                                                                                                        |
| <b>DEMOGRAPHICS</b>                                   |                                                                                                            |                                                                                                                                                              |
| 6                                                     | Initials (do not identify interviewee)                                                                     | [Free text]                                                                                                                                                  |
| 7                                                     | Sex                                                                                                        | <input type="radio"/> Male<br><input type="radio"/> Female                                                                                                   |
| 8                                                     | Role                                                                                                       | <input type="radio"/> Nurse<br><input type="radio"/> Nurse manager<br><input type="radio"/> Facility manger<br><input type="radio"/> Other...                |
| 9                                                     | Highest education                                                                                          | <input type="radio"/> College / university<br><input type="radio"/> High school<br><input type="radio"/> Other...                                            |
| 10                                                    | Years of experience with SI-SSS                                                                            | [Number]                                                                                                                                                     |
| <b>CLINIC INFRASTRUCTURE FOR SURVEILLANCE</b>         |                                                                                                            |                                                                                                                                                              |
| 11                                                    | Does the facility have a functioning phone (landline or cell phone) at all times?                          | <input type="radio"/> Yes, all the time<br><input type="radio"/> Yes, but not all the time<br><input type="radio"/> No<br><input type="radio"/> Don't know   |
| 12                                                    | Does the facility have a functioning computer?                                                             | <input type="radio"/> Yes<br><input type="radio"/> No<br><input type="radio"/> Don't know                                                                    |
| 13                                                    | Is there access to internet within the facility today?                                                     | <input type="radio"/> Yes<br><input type="radio"/> No<br><input type="radio"/> Don't know                                                                    |
| 14                                                    | Do you have experience using the internet?                                                                 | <input type="radio"/> Yes, a lot<br><input type="radio"/> Yes, a little<br><input type="radio"/> No                                                          |
| 15                                                    | Do you have private access to the internet?                                                                | <input type="radio"/> Yes, on phone / tablet<br><input type="radio"/> Yes, on computer<br><input type="radio"/> No                                           |
| 16                                                    | How many days it the clinic open?                                                                          | [Number]                                                                                                                                                     |
| 17                                                    | How many days does the clinic offer general out-patient clinic?                                            | [Number]                                                                                                                                                     |
| 18                                                    | On average, how many patients are seen by the clinic?                                                      | [Number]                                                                                                                                                     |
| 19                                                    | How many clinical staff that have a role in surveillance working at the clinic?                            | [Number]                                                                                                                                                     |
| <b>KNOWLEDGE OF SURVEILLANCE PURPOSE AND PRACTICE</b> |                                                                                                            |                                                                                                                                                              |
| 20                                                    | What do you see as the main functions of a disease surveillance system?                                    | [Free text]                                                                                                                                                  |
| 21                                                    | What do you understand to be the main purpose of the SI-SSS?                                               | [Free text]                                                                                                                                                  |
| 22                                                    | Do you see the SI-SSS having any other (secondary) purposes?                                               | [Free text]                                                                                                                                                  |
| 22                                                    | How accurate to you feel the current burden of infectious diseases in your area is captured by the SI-SSS? | <input type="radio"/> 1 Not at all<br><input type="radio"/> 2<br><input type="radio"/> 3<br><input type="radio"/> 4<br><input type="radio"/> 5 Very accurate |
|                                                       | Why do you say this? How could it be improved?                                                             | [Free text]                                                                                                                                                  |
| 23                                                    | How useful do you feel the SI-SSS is for identify outbreaks?                                               | <input type="radio"/> 1 Not at all<br><input type="radio"/> 2<br><input type="radio"/> 3                                                                     |

|                                               |                                                                                                                |                                                                                                                                                                                                                                                                                          |
|-----------------------------------------------|----------------------------------------------------------------------------------------------------------------|------------------------------------------------------------------------------------------------------------------------------------------------------------------------------------------------------------------------------------------------------------------------------------------|
|                                               |                                                                                                                | <input type="radio"/> 4<br><input type="radio"/> 5 Very useful                                                                                                                                                                                                                           |
| <b>ATTITUDE AND MOTIVATION</b>                |                                                                                                                |                                                                                                                                                                                                                                                                                          |
| 24                                            | In general, how do you feel about the SI-SSS?                                                                  | [Free text]                                                                                                                                                                                                                                                                              |
| 25                                            | Personally, how do you feel about being asked to collect data for the system?                                  | [Free text]                                                                                                                                                                                                                                                                              |
| 26                                            | What, if anything, makes your surveillance role challenging or difficult?                                      | [Free text]                                                                                                                                                                                                                                                                              |
| 27                                            | What do you see has / would motivate nurses to participate in the SI-SSS?                                      | [Free text]                                                                                                                                                                                                                                                                              |
| 29                                            | Do you have any other suggestions for ways staff may be encouraged / supported to collect data for the SI-SSS? | [Free text]                                                                                                                                                                                                                                                                              |
| 30                                            | What discourages staff from participating in the SI-SSS?                                                       | [Free text]                                                                                                                                                                                                                                                                              |
| 31                                            | Overall, how well do you think SI EWSS is performing regarding its primary purpose of detection outbreaks?     | <input type="radio"/> 1 Poorly<br><input type="radio"/> 2<br><input type="radio"/> 3<br><input type="radio"/> 4<br><input type="radio"/> 5 Very well                                                                                                                                     |
| <b>DATA COLLECTION AND REPORTING PRACTICE</b> |                                                                                                                |                                                                                                                                                                                                                                                                                          |
| 32                                            | Do you have written copies of the SSS case definitions?                                                        | <input type="radio"/> Yes, on display in clinic<br><input type="radio"/> Yes, but not on display<br><input type="radio"/> No                                                                                                                                                             |
| 33                                            | In your view, are the case definitions clear (unambiguous)?                                                    | <input type="radio"/> Yes<br><input type="radio"/> No                                                                                                                                                                                                                                    |
| 34                                            | Do you (or the facilities staff) have any problem applying the case definitions?                               | <input type="radio"/> Yes<br><input type="radio"/> No                                                                                                                                                                                                                                    |
| 35                                            | If yes, what are they?                                                                                         | [Free text]                                                                                                                                                                                                                                                                              |
| 36                                            | In your view, how consistently are the case definitions applied by staff at your facility?                     | <input type="radio"/> 1 Poorly<br><input type="radio"/> 2<br><input type="radio"/> 3<br><input type="radio"/> 4<br><input type="radio"/> 5 Very well                                                                                                                                     |
|                                               | If not consistently, what inhibits their use?                                                                  | [Free text]                                                                                                                                                                                                                                                                              |
| 37                                            | At what point (time) are case definition applied?                                                              | <input type="radio"/> When patient is seen<br><input type="radio"/> At the end of the day<br><input type="radio"/> At the end of the week by clinic staff<br><input type="radio"/> At the end of the week by MHMS<br><input type="radio"/> Don't know<br><input type="radio"/> Other.... |
| 38                                            | If at the end of the day/week, how are case definition applied accurately?                                     | [Free text]                                                                                                                                                                                                                                                                              |

|                                   |                                                                            |                                                                                                                                                                                          |
|-----------------------------------|----------------------------------------------------------------------------|------------------------------------------------------------------------------------------------------------------------------------------------------------------------------------------|
| 39                                | In your view, how accurate is the count of case reported by your facility? | <input type="radio"/> 1 Very poor<br><input type="radio"/> 2<br><input type="radio"/> 3<br><input type="radio"/> 4<br><input type="radio"/> 5 Very accurate                              |
| 40                                | Is data ever checked for its accuracy?                                     | <input type="radio"/> Yes<br><input type="radio"/> No<br><input type="radio"/> Don't know                                                                                                |
| 41                                | How is surveillance data transmitted to MHMS?                              | <input type="radio"/> Phone call<br><input type="radio"/> Email<br><input type="radio"/> SMS/TXT<br><input type="radio"/> Delivered in person<br><input type="radio"/> Picked up by MHMS |
| 42                                | How reliable is this method?                                               | <input type="radio"/> Very<br><input type="radio"/> Somewhat<br><input type="radio"/> Not very / poor                                                                                    |
| 43                                | What inhibits (gets in the road) of on time data collection and reporting? | [Free text]                                                                                                                                                                              |
| <b>ELECTRONIC DATA COLLECTION</b> |                                                                            |                                                                                                                                                                                          |
| 44                                | Do you see value in electronic data transfer of EWSS data?                 | <input type="radio"/> Yes, a lot<br><input type="radio"/> Yes, some<br><input type="radio"/> No                                                                                          |
| 45                                | If yes, what value do you see?                                             | [Free text]                                                                                                                                                                              |
| 46                                | What barriers do you see?                                                  | [Free text]                                                                                                                                                                              |
| 47                                | Would it be feasible to report data more frequently?                       | <input type="radio"/> Yes, daily<br><input type="radio"/> Yes, twice weekly<br><input type="radio"/> No                                                                                  |
| 48                                | If not, why?                                                               | [Free text]                                                                                                                                                                              |
| 49                                | Do you have any other comments you'd like to add?                          | [Free text]                                                                                                                                                                              |
| <b>FEEDBACK</b>                   |                                                                            |                                                                                                                                                                                          |
| 50                                | Would you like to receive feedback on the results of this study?           | <input type="radio"/> Yes<br><input type="radio"/> No                                                                                                                                    |
| 51                                | If Yes, provide contact details                                            |                                                                                                                                                                                          |
